# Supplementary material
Source: publisher figshare collection journal article supplement (https://tandf.figshare.com/ndownloader/files/12404048)

**Supplementary Figure 1.** Size distribution of the synthesized CaHAp

**
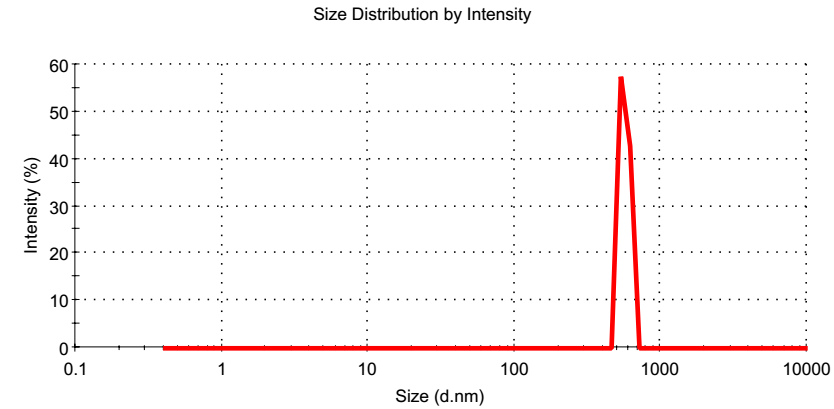
**

Supplement: Supplementary file 1 [file 12404048]
